# Supplementary material for: Polydopamine-modified ROS-responsive prodrug nanoplatform with enhanced stability for precise treatment of breast cancer
Source: PubMed Central journal article supplement — RSC Adv. 2019 Mar 21;9(16):9260–9. doi: 10.1039/c9ra01230c (PMC9062053; doi:10.1039/c9ra01230c), 2019-03-21
Supplement: RA-009-C9RA01230C-s001.pdf [file RA-009-C9RA01230C-s001.pdf]

## Supporting Information

### **Polydopamine-Modified ROS-responsive Prodrug Nanoplatform with Enhanced Stability for precise treatment of breast cancer**

Bin Yang <sup>a, 1</sup> Kaiyuan Wang <sup>a, 1</sup> Dong Zhang <sup>a</sup>, Bin Ji <sup>b</sup>, Dongyang Zhao <sup>a</sup>, Xin Wang <sup>a</sup>, Haotian Zhang <sup>c</sup>, Qiming Kan <sup>c</sup>, Zhonggui He <sup>a</sup> and Jin Sun <sup>a,\*</sup>

#### Affiliations:

<sup>a</sup> Department of Pharmaceutics, Wuya College of Innovation, Shenyang Pharmaceutical University, Shenyang, Liaoning, 110016, China

<sup>b</sup> Department of Laboratory Medicine, The First Affiliated Hospital, China Medical University, Shenyang, Liaoning, 110001, China

<sup>c</sup> School of Life Science and Biopharmaceutics, Shenyang Pharmaceutical University, Wenhua Road, No. 103, Shenyang 110016, China

<sup>1</sup> Author Contributions: Both contributed to this work equally.

\*Corresponding authors:

Prof. Jin Sun, Ph.D.

Wuya College of Innovation, Shenyang Pharmaceutical University, Shenyang, Liaoning, 110016, P.

R. China

Tel: +86-24-23986325; Fax: +86-24-23986325

E-mail address: sunjinsypharm@163.com

## Synthesis the prodrug of PTX

As illustrated in Fig. S1, the maleimide-bearing prodrugs (PTX-S-MAL) were synthesized by conjugating 6-Maleimidocaproic acid 2-hydroxyethyl ester to PTX via inserting a thioether bond linker. The chemical structure of PTX-S-MAL was confirmed by mass spectrum and <sup>1</sup>H NMR spectroscopy (Fig. S2 -S3).

### PTX-S-MAL <sup>1</sup>H-NMR (400MHz, CDCl<sub>3</sub>):

<sup>1</sup>H-NMR (400 MHz, CDCl<sub>3</sub>, δ ppm): 8.15 (d, 2H), 7.77 (d, 2H), 7.61 (m, 1H), 7.52 (m, 3H), 7.42 (d, 4H), 7.37 (m, 3H), 6.66 (s, 2H, -COCH=CHCO-), 6.30 (t, 2H, 10-H, 13-H), 6.06 (dd, 1H, J=5.7 Hz, J=2.1 Hz, 3<sup>1</sup>-H), 5.69 (d, 1H, J=5.4 Hz, 2-H), 5.50 (d, 1H, J=2.4 Hz, 2<sup>1</sup>-H), 5.30 (d, 1H, J=6.9 Hz, -NH-), 4.99 (d, 1H, J=6.9 Hz, 5-H), 4.46 (t, 1H, 7-H), 4.33 (d, 1H, J=6.0 Hz, 20α-H), 4.27 (s, 4H, -OCH<sub>2</sub>CH<sub>2</sub>O-), 4.22 (d, 1H, J=6.3 Hz, 20β-H), 3.82 (d, 1H, J=5.1 Hz, 3-H), 3.49 (t, 2H, -CH<sub>2</sub>-N (CO) CO), 3.22 (m, 4H, -COCH<sub>2</sub>SCH<sub>2</sub>CO-), 2.88 (m, 1H, 6α-H), 2.48 (s, 3H, 4-COCH<sub>3</sub>), 2.40 (m, 2H, 14α-H, 14β-H), 2.29 (t, 2H, J=5.7 Hz, -CH<sub>2</sub>CO-), 2.23 (s, 3H, 10-COCH<sub>3</sub>), 2.18 (t, 2H, J=6.9 Hz, -CH<sub>2</sub>CO-), 1.95 (s, 3H, 18-H), 1.87 (t, 1H, 6β-H), 1.69 (s, 3H, 19-H), 1.60 (m, 4H, -CH<sub>2</sub>CH<sub>2</sub>CH<sub>2</sub>-), 1.25 (m, 2H, -CH<sub>2</sub>CH<sub>2</sub>CH<sub>2</sub>-), 1.24 (s, 3H, 17-H), 1.14 (s, 3H, 16-H). MS (ESI) (m/z): calcd for C<sub>63</sub>H<sub>71</sub>N<sub>2</sub>O<sub>21</sub>S: m/z

|        |                       |        |         |
|--------|-----------------------|--------|---------|
| 1246.3 | [M+Na] <sup>+</sup> ; | found: | 1223.3. |
|--------|-----------------------|--------|---------|

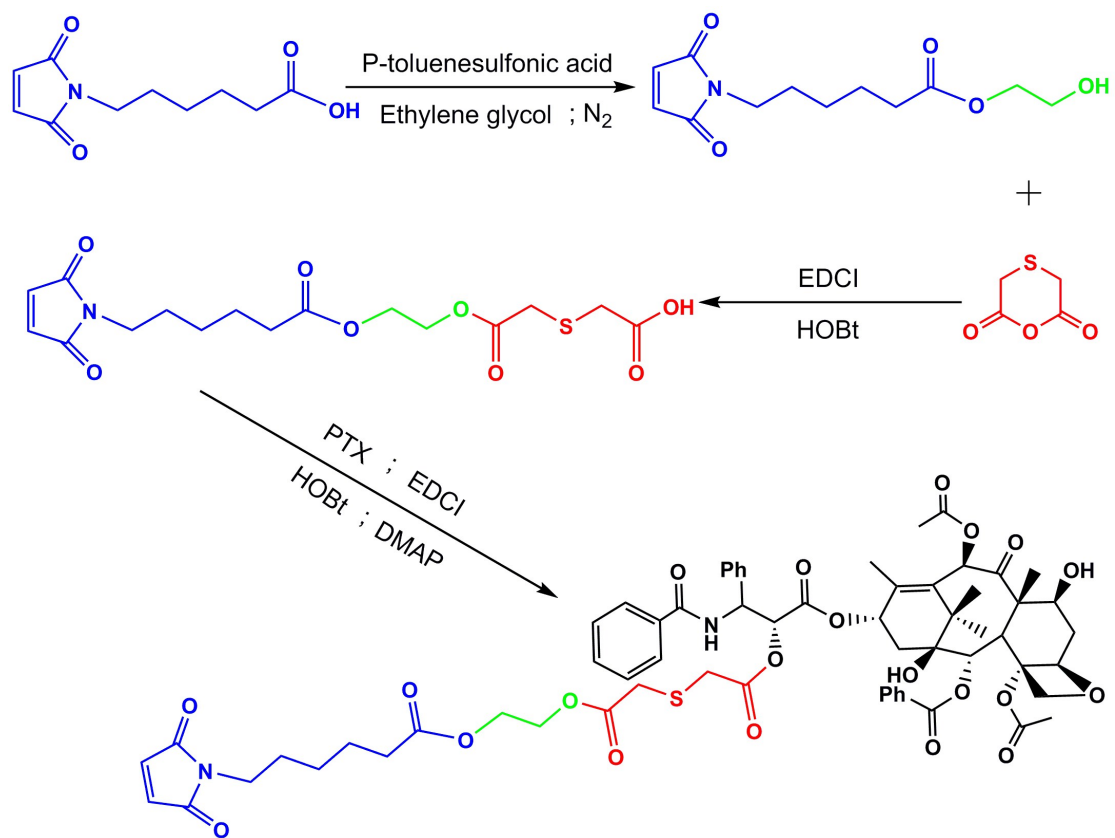

**FigS1.** Synthesis procedure of PTX-S-MAL

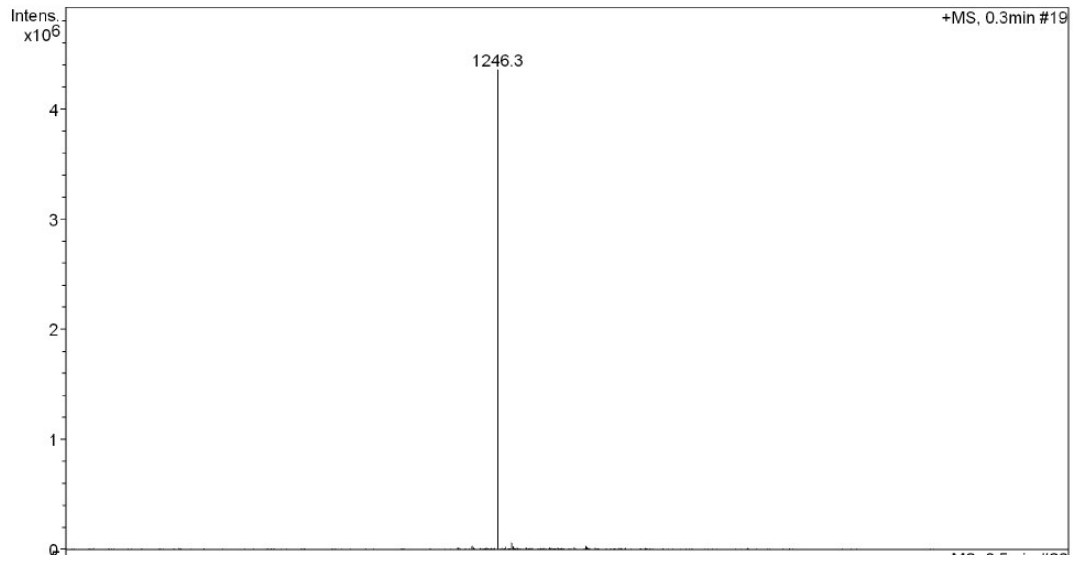

**FigS2.** Mass spectrum of PTX-S-MAL

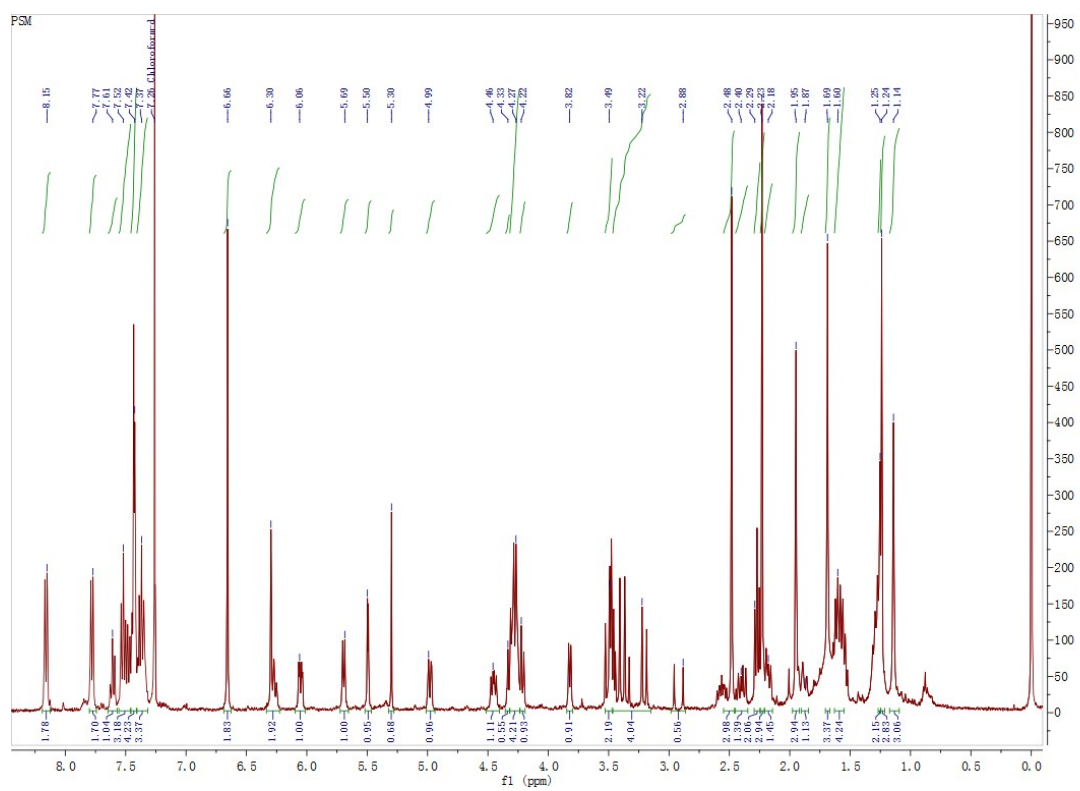

FigS3. <sup>1</sup>H NMR spectrum of PTX-S-MAL

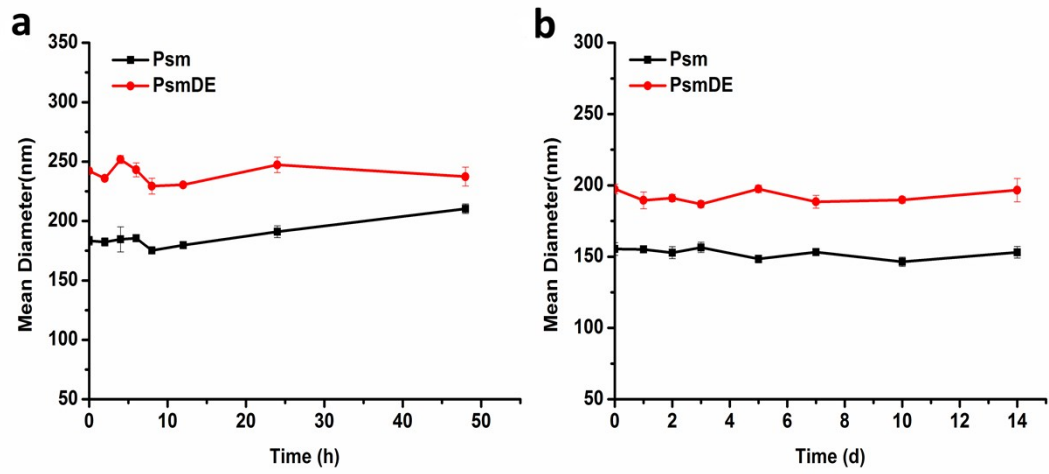

**FigS4.** (a) Colloidal stability of Psm and PsmDE after incubation in PBS (pH 7.4) supplemented with 10% FBS at 37 °C. (b) Long-term stability of Psm and PsmDE after store at 4 °C.

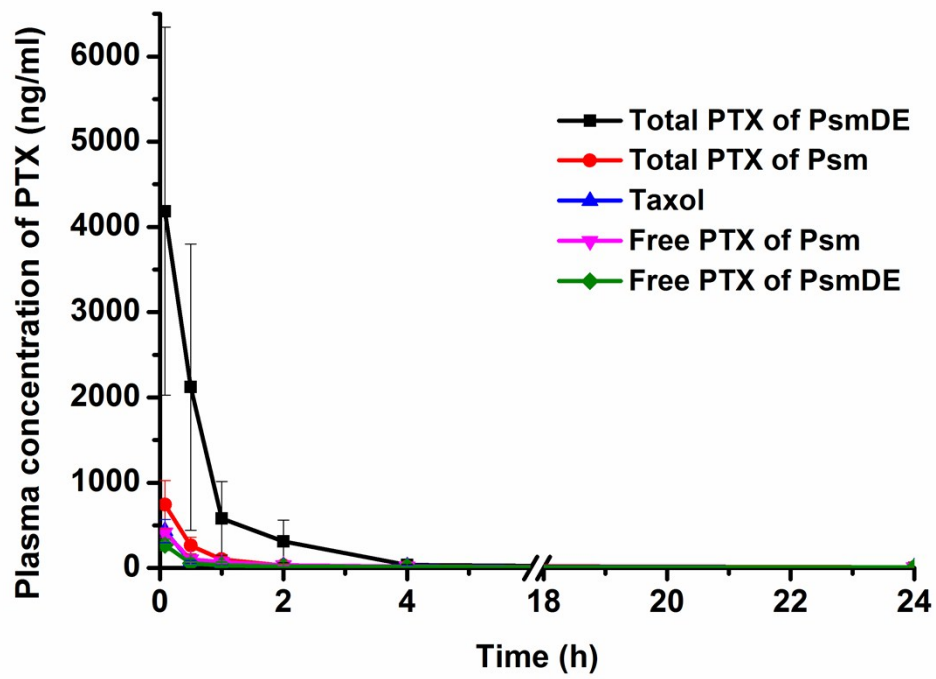

**FigS5.** *In vivo* plasma concentration-time profiles of free and total PTX in blood after Taxol, Psm, and PsmDE were intravenously injected into the mice through the tail vein at a PTX dose of 1 mg/kg. All data are presented as mean  $\pm$  SD (n=5).

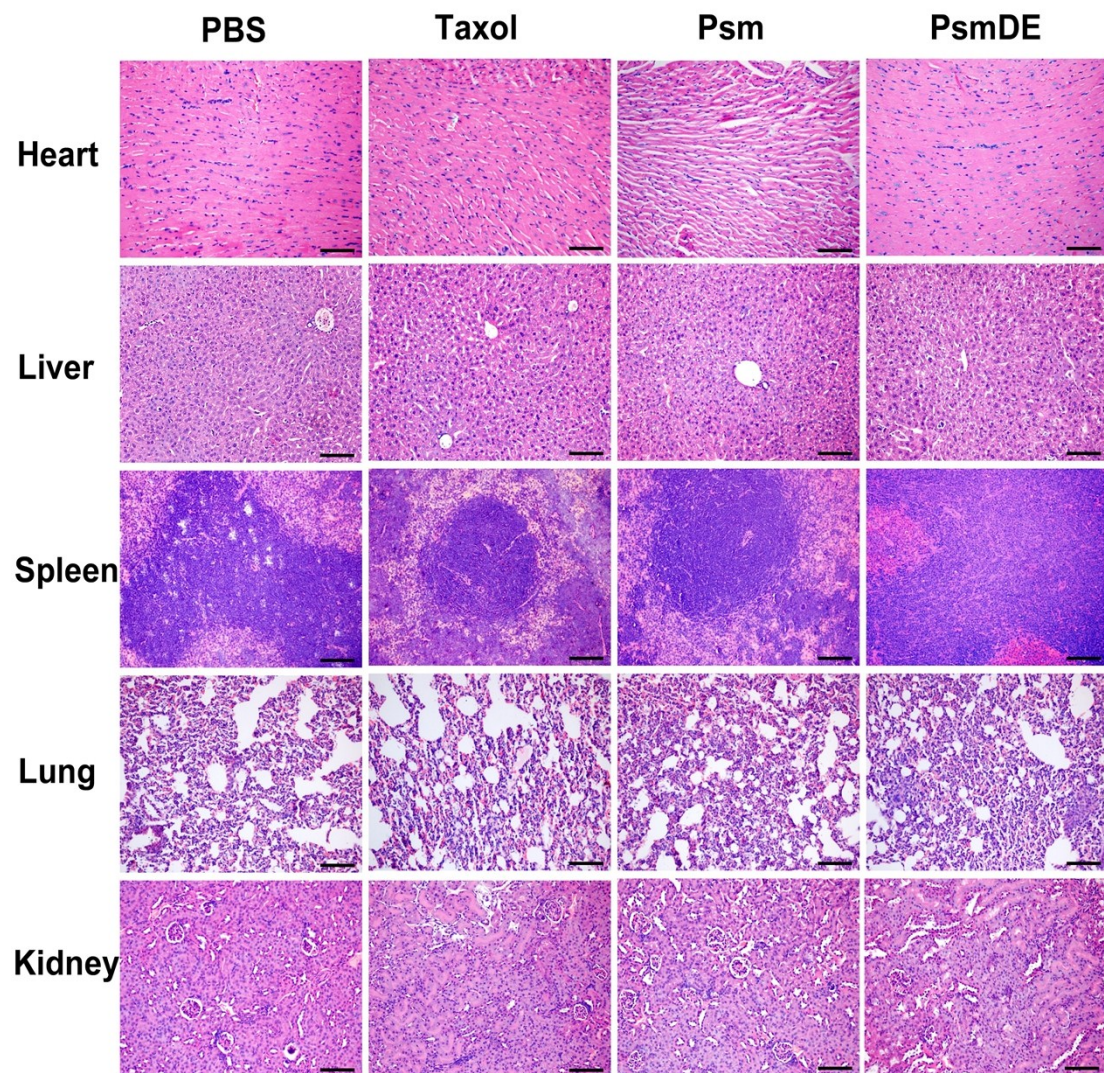

**FigS6.** H&E stained images of major organs; Heart, Liver, spleen, lung and kidney of healthy mice. The mice were sacrificed.



Table S1. Characteristics of Prodrug NPs

| PPa/NPs | Size <sup>a</sup> (nm) | Zeta <sup>b</sup> (mv) | PDI <sup>c</sup> |
|---------|------------------------|------------------------|------------------|
| Psm     | 165.7 ± 5.8            | -20.2 ± 0.74           | 0.079 ± 0.018    |
| PsmD    | 183.7 ± 1.3            | -25.1 ± 3.07           | 0.066 ± 0.056    |
| PsmDE   | 196.4 ± 5.8            | -18.1 ± 1.56           | 0.099 ± 0.094    |

a) Mean diameters and b) Zeta potential of prodrug NPs obtained by DLS. c) Polydispersity index of the Prodrug NPs.

Table S2. In vitro cytotoxicity ( $IC_{50}$  values) of PTX-sol and Prodrug NPs to 4T1 cancer cells (MTT assay).

| Formulations | 4T1 (nM) |       |
|--------------|----------|-------|
|              | 48 h     | 72 h  |
| PTX-sol      | 59.6     | 21.46 |
| Psm          | 59.3     | 30.1  |
| PsmDE-       | 76.31    | 31.8  |

Table S3. In vitro cytotoxicity ( $IC_{50}$  values) of PTX-sol and Prodrug NPs to 3T3 cancer cells (MTT assay).

| Formulations | 3T3 (nM) |       |
|--------------|----------|-------|
|              | 48 h     | 72 h  |
| PTX-sol      | 245.6    | 148.8 |
| Psm          | 511.9    | 344.2 |
| PsmDE-       | 630.3    | 435.6 |
